# Supplementary material
Source: PubMed Central journal article supplement (PMC3612171)
Supplement: supp_121383_status-hwang-1-at.pdf [file supp_121383_status-hwang-1-at.pdf]

**Appendix 1 (as supplied by the authors): Patient responses to questions from physician's office**

| <b>Question from Physician's Office</b>                                                                       | <b>Patient Response</b>                                                                                       |
|---------------------------------------------------------------------------------------------------------------|---------------------------------------------------------------------------------------------------------------|
| What is your name?                                                                                            | [Male] Greg Jackson<br>[Female] Michelle Jackson                                                              |
| How old are you?                                                                                              | I'm 35 years old.                                                                                             |
| What is your date of birth?                                                                                   | January 9, 1976.                                                                                              |
| Do you have any other family members who need a doctor?                                                       | No                                                                                                            |
| Are you married?                                                                                              | No                                                                                                            |
| Do you have any children?                                                                                     | No                                                                                                            |
| Why you need a family doctor?                                                                                 | I just moved here, and I don't have a family doctor.                                                          |
| Who was your previous family doctor?                                                                          | I don't have one. I've been using walk-in clinics.                                                            |
| Do you live in the area?                                                                                      | Yes                                                                                                           |
| Where do you live?                                                                                            | [Major intersection near physician's office, selected in advance of call using online map]                    |
| Where did you move from?                                                                                      | I was living in Sudbury before I moved to Toronto.*                                                           |
| Where are you calling from?                                                                                   | From my cell phone.                                                                                           |
| Where can I reach you?                                                                                        | You can reach me at my cell number.                                                                           |
| When are you available to come in?                                                                            | Any time.                                                                                                     |
| Can you come in today to see the doctor?                                                                      | I can't come in today. Do you have an appointment for any other time?                                         |
| Can I get back to you?                                                                                        | Yes, please call me on my cell number.                                                                        |
| How did you get our number?                                                                                   | I looked you up online. [If asked for further details] It was the doctor list from the College of Physicians. |
| Have you tried another family doctor?                                                                         | I have been calling around the area with no luck so far.                                                      |
| Do you have an OHIP card? **                                                                                  | Yes                                                                                                           |
| Are you sick right now (today)?                                                                               | No                                                                                                            |
| [For patient without chronic health conditions] Do you have any health problems?                              | No                                                                                                            |
| [For patient with diabetes and back pain] Do you have any health problems, other than diabetes and back pain? | No                                                                                                            |
| [For patient with diabetes and back pain] Are you currently taking any medication for your diabetes?          | No                                                                                                            |

[For patient with diabetes and back pain] No  
Are you currently taking any narcotics  
for your back pain?

[For patient with diabetes and back pain] No  
Are you looking for a physician to  
prescribe narcotics for your back pain?

\* Sudbury (population 165,000) is a city located about 240 miles north of Toronto.

\*\* The Ontario Health Insurance Plan (OHIP) card serves as proof of coverage under Ontario's universal health insurance system.
